# Supplementary material for: Accurate mobile remote sensing of XCO 2 and XCH 4 latitudinal transects from aboard a research vessel
Source: Copernicus journal article supplement (doi:10.5194/amt-8-5023-2015), 2015-12-01
Supplement: Supplementary file 1 [file amt-8-5023-2015-supplement.zip]

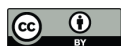

## *Supplement of*

# **Accurate mobile remote sensing of $\text{XCO}_2$ and $\text{XCH}_4$ latitudinal transects from aboard a research vessel**

**F. Klappenbach et al.**

*Correspondence to:* F. Klappenbach ([friedrich.klappenbach@kit.edu](mailto:friedrich.klappenbach@kit.edu))

- [amt-8-5023-2015-supplement-title-page.pdf](#)
- [PolarsternData.nc](#)
- [XCO2\\_XCH4\\_ANTXXIX\\_10.csv](#)

The copyright of individual parts of the supplement might differ from the CC-BY 3.0 licence.
